# Supplementary material for: Genetic Variability in Carotenoid Contents in a Panel of Genebank Accessions of Temperate Maize from Southeast Europe
Source: MDPI journal article supplement (doi:10.3390/plants12193453), 2023-09-30
Supplement: s1 [file s1]

Table S1. Maize accessions from Croatian plant genetic resources database (CPGRD) used in the study, their parentage, percentage of native germplasm, color and type of kernel

| No. | CPGRD code | Accession name | Background                      | % native germplasm | Kernel color <sup>†</sup> | Kernel type <sup>‡</sup> |
|-----|------------|----------------|---------------------------------|--------------------|---------------------------|--------------------------|
| 1   | CAM00059   | LTW109-2       | LF x(L131F-d x LE)              | 23                 | O                         | F                        |
| 2   | CAM00060   | LTW112         | (L1-26 x SD36)x SD36            | 23                 | Y                         | SF                       |
| 3   | CAM00061   | LTW126         | (Sin39 x Sin38)x B88            | 0                  | O                         | F                        |
| 4   | CAM00062   | LTW21          | L86 x(Bc488 x L85)              | 75                 | O                         | SD                       |
| 5   | CAM00063   | LTW32-2        | H99 x(L131F-d x H99)            | 23                 | O                         | SD                       |
| 6   | CAM00064   | LTW56-2        | L90 x(B70 x H99)                | 50                 | O                         | F                        |
| 7   | CAM00065   | LTW60          | (SD36 x H99)x L81ŠL             | 44                 | Y                         | SD                       |
| 8   | CAM00066   | LTW63          | L86 x(Bc488 x LF)               | 50                 | Y                         | SF                       |
| 9   | CAM00067   | LTW8-1         | L80 x(D-Bc7-9549 x D-Bc7-608)   | 50                 | Y                         | SD                       |
| 10  | CAM00068   | LTW84-1        | SD36 x(L80 x SD36)              | 23                 | PY                        | SD                       |
| 11  | CAM00069   | LTW85          | L81ŠL x(SD36 x H99)             | 44                 | O                         | F                        |
| 12  | CAM00070   | TH126          | SD36 x Pa402                    | 0                  | O                         | SD                       |
| 13  | CAM00071   | TH 13-3        | L86 x SD36                      | 50                 | O                         | SD                       |
| 14  | CAM00072   | TH136          | L1-26 x L131F-d                 | 94                 | O                         | F                        |
| 15  | CAM00073   | TH14-1         | L86 x SD36                      | 50                 | Y                         | SD                       |
| 16  | CAM00074   | TH152          | L81/ZMR x SD36                  | 50                 | Y                         | SD                       |
| 17  | CAM00075   | TH158          | L131F-e x SD36                  | 47                 | Y                         | SF                       |
| 18  | CAM00076   | TH163          | L1-26 x SD36                    | 47                 | O                         | SD                       |
| 19  | CAM00077   | TH167          | Lady Finger x Long Ear material | 0                  | Y                         | SD                       |
| 20  | CAM00078   | TH174          | L1-26 x L131F                   | 100                | O                         | SF                       |
| 21  | CAM00079   | TH18-2         | L86 x L131F-d                   | 97                 | O                         | F                        |
| 22  | CAM00080   | TH21           | L86 x L131F-d                   | 97                 | O                         | SD                       |
| 23  | CAM00081   | TH229-2        | L131F-e x BSTL                  | 47                 | PY                        | SF                       |
| 24  | CAM00082   | TH249          | L219 x red stalk material       | 50                 | DO                        | SD                       |
| 25  | CAM00083   | TH251          | H99 x B88                       | 0                  | O                         | SD                       |
| 26  | CAM00084   | TH288-3        | Pa402 x SD36                    | 0                  | Y                         | SF                       |
| 27  | CAM00085   | TH289          | Pa402 x SD36                    | 0                  | O                         | SF                       |
| 28  | CAM00086   | TH295-1        | L80 x SD36                      | 50                 | PY                        | D                        |
| 29  | CAM00087   | TH30-2         | L1-26 x L131F                   | 100                | Y                         | D                        |
| 30  | CAM00088   | TH304-1        | L131F-e x SD36                  | 47                 | O                         | F                        |
| 31  | CAM00089   | TH322          | L81ŠL x LE (long ear material)  | 44                 | Y                         | F                        |
| 32  | CAM00090   | TH348          | L131F-d x SD36                  | 47                 | Y                         | SF                       |
| 33  | CAM00091   | TH350-2        | L131F x LF (lady finger)        | 50                 | Y                         | SF                       |
| 34  | CAM00092   | TH351          | L1-26 x BSUL                    | 47                 | Y                         | SD                       |
| 35  | CAM00093   | TH352          | L1-26 x BSUL                    | 47                 | Y                         | SF                       |
| 36  | CAM00094   | TH367          | B87 x H99                       | 0                  | O                         | F                        |
| 37  | CAM00095   | TH369-1        | B87 x H99                       | 0                  | DO                        | SF                       |
| 38  | CAM00096   | TH370          | L131F-d x Mich80-3              | 47                 | DO                        | SF                       |

|    |          |         |                                                         |     |    |    |
|----|----------|---------|---------------------------------------------------------|-----|----|----|
| 39 | CAM00097 | TH374-1 | L131F-d x B88                                           | 47  | O  | SD |
| 40 | CAM00098 | TH378-1 | L131F-e x MICH (unknown material from Michigan Univ.)   | 47  | O  | F  |
| 41 | CAM00099 | TH381   | L86 x Mo17                                              | 50  | Y  | SD |
| 42 | CAM00100 | TH384   | L86 x SD36                                              | 50  | Y  | SF |
| 43 | CAM00101 | TH387   | L81ŠL x red stalk material                              | 44  | Y  | F  |
| 44 | CAM00102 | TH388-2 | L80 x Mo17                                              | 50  | Y  | SF |
| 45 | CAM00103 | TH390-3 | L80 x Mo17                                              | 50  | O  | SF |
| 46 | CAM00104 | TH392-2 | SD36 x B88                                              | 0   | Y  | SF |
| 47 | CAM00105 | TH393-1 | SD36 x B88                                              | 0   | O  | SF |
| 48 | CAM00106 | TH410-1 | SD36 x L81ŠL                                            | 44  | O  | SD |
| 49 | CAM00107 | TH411-1 | SD36 x KAVA (material with coffee-like colour of grain) | 0   | O  | F  |
| 50 | CAM00108 | TH42-1  | Bc488 x L86                                             | 50  | O  | SF |
| 51 | CAM00109 | TH421-1 | SD36 x H99                                              | 0   | O  | SF |
| 52 | CAM00110 | TH423   | SD36 x Pa402                                            | 0   | O  | F  |
| 53 | CAM00111 | TH438   | B70 x H99                                               | 0   | O  | SD |
| 54 | CAM00112 | TH443-2 | Bc24 x BSTL                                             | 0   | O  | SD |
| 55 | CAM00113 | TH73-1  | R588 x R59                                              | 0   | Y  | F  |
| 56 | CAM00114 | TH82-1  | L86 x H99                                               | 50  | O  | SF |
| 57 | CAM00115 | TH91-3  | L86 x Pa402                                             | 50  | O  | SF |
| 58 | CAM00116 | TH93-1  | L86 x Pa402                                             | 50  | O  | SF |
| 59 | CAM00117 | TH95    | L80 x SD36                                              | 50  | O  | SF |
| 60 | CAM00118 | TH128   | SD36xPa402                                              | 0   | Y  | SD |
| 61 | CAM00119 | TH143   | R588xR59                                                | 0   | Y  | SD |
| 62 | CAM00120 | TH148   | L131F-d x SD36                                          | 47  | O  | SD |
| 63 | CAM00121 | TH273-2 | L131F-dxH99                                             | 47  | O  | F  |
| 64 | CAM00122 | TH275   | SD36xPa402                                              | 0   | Y  | SD |
| 65 | CAM00123 | TH282   | L1-26xSE (short ear material)                           | 47  | O  | SF |
| 66 | CAM00124 | TH400   | L131F-d x B88                                           | 47  | Y  | F  |
| 67 | CAM00125 | L80     | Bujstina, population from Istra                         | 100 | O  | F  |
| 68 | CAM00126 | 10763   | Unknown, Rugvica A41 (?)                                | 0   | O  | SF |
| 69 | CAM00127 | F7      | Pop. Lacaune (France)                                   | 0   | PY | F  |
| 70 | CAM00128 | H99-5   | Illinois Syn.60C (Purdue)                               | 0   | DO | SF |
| 71 | CAM00129 | LFB-3   | "Šidski zuban", (L12 x Lady finger)x L12, 4x            | 97  | O  | SD |
| 72 | CAM00130 | LFC-2   | "Šidski zuban", (L12 x Lady finger)x L12, 4x            | 97  | O  | SD |
| 73 | CAM00131 | LFC-2e  | "Šidski zuban", (L12 x Lady finger)x L12, 4x            | 97  | Y  | SD |
| 74 | CAM00132 | LM23-1  | (L131F x L80) x (L131F x M/Tr)                          | 75  | O  | F  |
| 75 | CAM00133 | LCA     | Unknown (red aleurone)                                  | 0   | Y  | SF |

|    |          |          |                                                 |     |    |    |
|----|----------|----------|-------------------------------------------------|-----|----|----|
| 76 | CAM00134 | LS39-5   | Russian synth.(Sin.39 x L131F-d)                | 47  | Y  | SF |
| 77 | CAM00135 | LE       | Long ear material                               | 0   | O  | F  |
| 78 | CAM00136 | LS34-2   | Russian synth.(Sin.34)                          | 0   | PY | SD |
| 79 | CAM00137 | LS36b    | Russian synth. (Sin.36)                         | 0   | PY | SD |
| 80 | CAM00138 | NF       | "Novosadski Fleischman"                         | 100 | Y  | SF |
| 81 | CAM00139 | TH240    | LF x L81ŠL                                      | 44  | O  | SF |
| 82 | CAM00140 | LTW119-1 | H99 x(MICH x H99)                               | 0   | O  | F  |
| 83 | CAM00141 | Pa402-1  | USA, Pa402p Pioneer<br>Syn.(S.African Syn.)     | 0   | Y  | SD |
| 84 | CAM00142 | Pa402-2  | USA, Pa402p Pioneer<br>Syn.(S.African Syn.)     | 0   | Y  | SD |
| 85 | CAM00143 | L68R-3   | Obtained from Bc Institute,<br>Rugvica, unknown | 0   | O  | F  |
| 86 | CAM00144 | L5R-1    | Obtained from Bc Institute,<br>Rugvica, unknown | 0   | PY | D  |
| 87 | CAM00145 | L29R-1   | Obtained from Bc Institute,<br>Rugvica, unknown | 0   | O  | SD |
| 88 | CAM00146 | TZ41-1   | Population from Tuzla, altitude<br>500m         | 100 | O  | SD |

---

† PY-pale yellow; Y-yellow; O-orange; DO-deep orange

‡ D-dent; SD-semi dent; SF-semi flint; F-flint
